# Supplementary material for: Pool size estimations for dense‐core vesicles in mammalian CNS neurons
Source: PubMed Central journal article supplement (PMC6187028; doi:10.15252/embj.201899672), 2018-09-05
Supplement: EMBJ-37-e99672-s001.pdf [file EMBJ-37-e99672-s001.pdf]

## Expanded View Figures

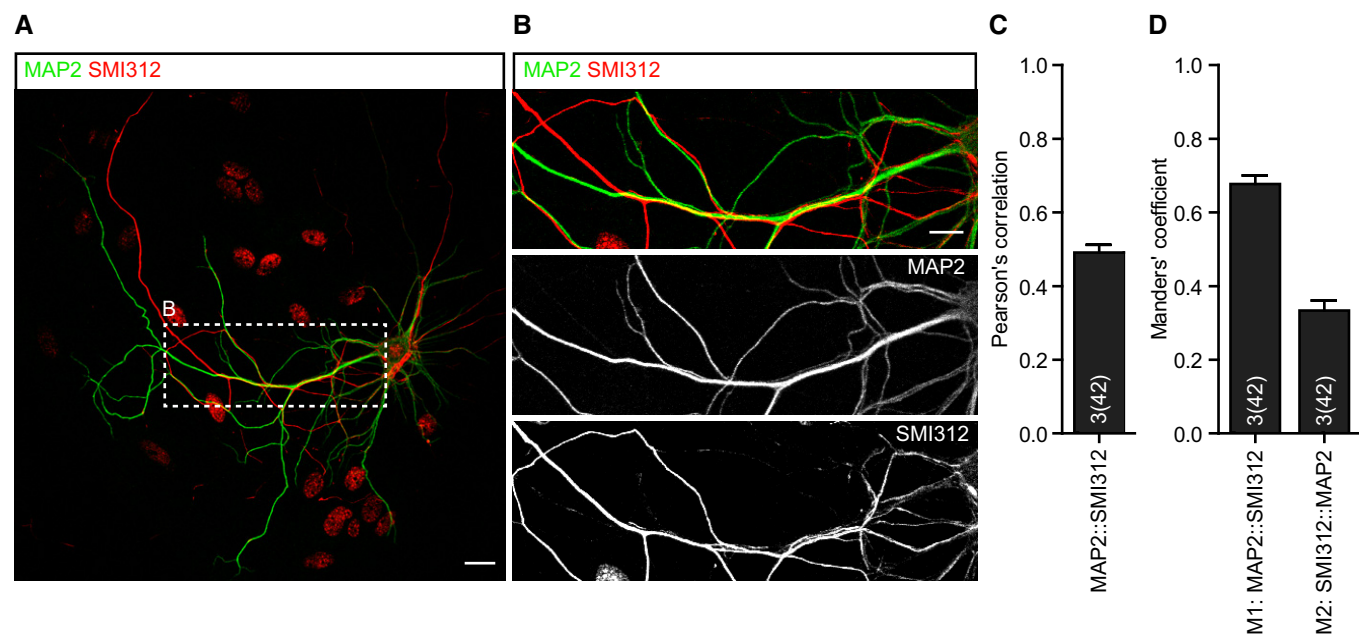

**Figure EV1. Axons and dendrites significantly overlap in single isolated hippocampal neurons.**

A Representative confocal image of a single isolated hippocampal neuron (DIV14) immunostained for the dendritic marker MAP2 (green) and the axonal marker SMI312 (red). Scale bar: 20  $\mu$ m.

B Zoom of area indicated in (A) showing axons frequently running parallel to dendrites. Scale bar: 10  $\mu$ m.

C Pearson's correlation of colocalization analysis between MAP2 and SMI312.

D Manders' coefficients of colocalization analysis between MAP2 and SMI312.

Data information: Bars show mean  $\pm$  SEM. *N* numbers represent number of experiments and number of individual observations (neurons) in brackets.

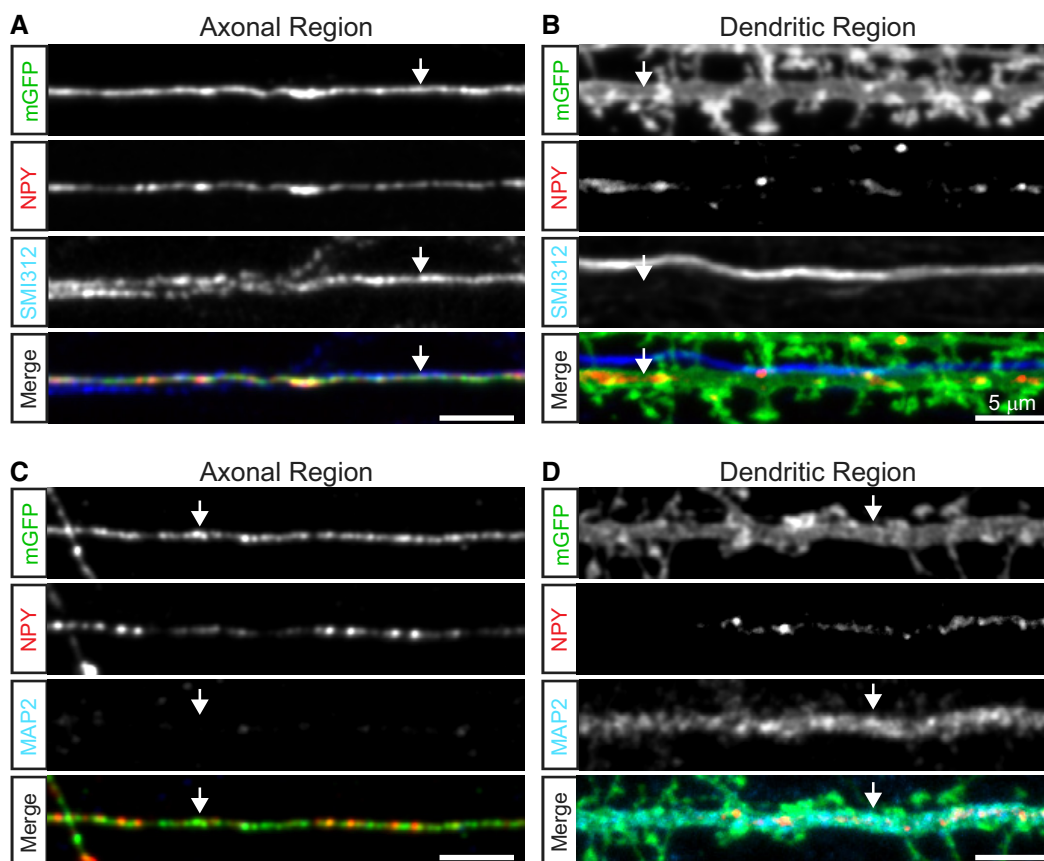

**Figure EV2. Identification of axons and dendrites in sparse-labeled high-density culture.**

A–D Representative confocal zooms of high-density hippocampal neuron culture (DIV14) sparse-labeled with membrane-targeted EGFP (mEGFP) and NPY-mCherry, immunostained for the axonal marker SMI312 (A, B) or dendritic marker MAP2 (C, D). Scale bars: 5 μm. (A) Zoom of axon labeled with membrane-targeted EGFP and positive for the axonal marker SMI312 (indicated by arrows). (B) Zoom of dendrite labeled with membrane-targeted EGFP and negative for the axonal marker SMI312 (indicated by arrows). (C) Zoom of axon labeled with membrane-targeted EGFP and negative for the dendrite marker MAP2 (indicated by arrows). (D) Zoom of dendrite labeled with membrane-targeted EGFP and positive for the dendrite marker MAP2 (indicated by arrows).

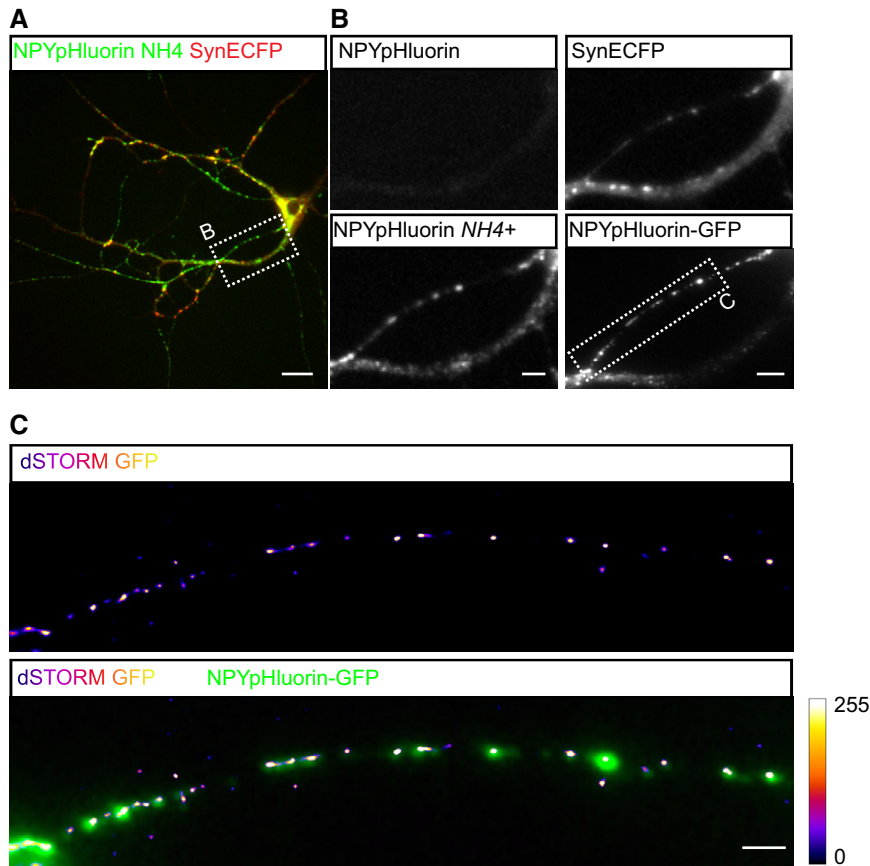

**Figure EV3. dSTORM imaging of NPY-pHluorin.**

**A** Still of live hippocampal neuron (DIV 14) infected with NPY-pHluorin (green) and synapse marker Syn-ECFP (red), superfused with NH<sub>4</sub>-Tyrodes to visualize the total NPY-pHluorin pool. Scale bar: 20 μm.

**B** Zoom of region indicated in (A). Live NPY-pHluorin signal before NH<sub>4</sub>-Tyrodes application (upper left). Live NPY-pHluorin signal upon NH<sub>4</sub>-Tyrodes application (lower left). Live Syn-ECFP signal (upper right). *Post hoc* immunoreactivity of NPY-pHluorin labeled with anti-GFP (lower right). Scale bars: 5 μm.

**C** Reconstructed GFP localizations of dSTORM imaging of zoomed region indicated in (B) (lower right). Lower panel shows overlay between dSTORM GFP localizations and NPY-pHluorin-GFP immunoreactivity (confocal, 40×). Calibration bar represents no (0) to high (255) clustering of dSTORM localizations. Scale bars: 2 μm.
